# Supplementary material
Source: PubMed Central journal article supplement (PMC2650138)
Supplement: 0803202106_0803202106SI.pdf [file 0803202106_0803202106SI.pdf]

# Supporting Information

Gosse and Baier 10.1073/pnas.0803202106

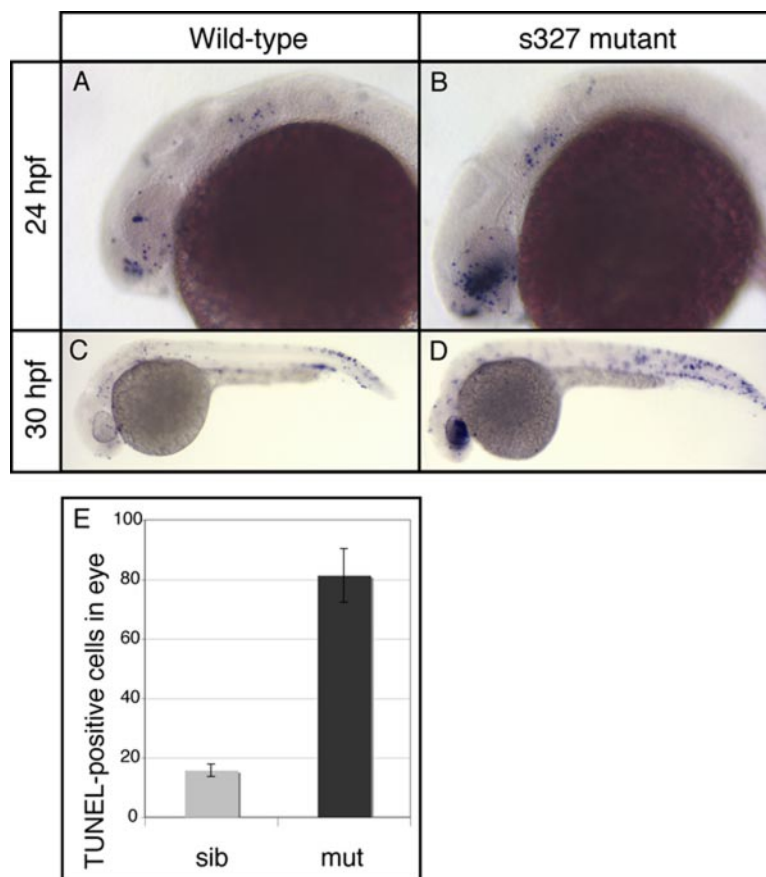

**Fig. S1.** Increased cell death in the eyes of *radar<sup>s327</sup>* mutants. Lateral views of whole-mount TUNEL-stained embryos. (A) 24 hours post-fertilization (hpf) WT embryos have small numbers of TUNEL-positive cells throughout the head and trunk. (B) 24 hpf *radar<sup>s327</sup>* mutant embryos have a large increase in TUNEL reactivity in the developing eye. (C and D) 30 hpf *radar<sup>s327</sup>* mutant embryos have significantly more TUNEL-positive cells in the eyes than WT. The difference is less dramatic in the trunk. (E) Quantification of TUNEL staining in 30 hpf embryos. *radar<sup>s327</sup>* mutants ( $n = 6$ ) have significantly more TUNEL-positive cells in the eye than WT embryos ( $n = 8$ ,  $t$  test,  $P < 0.000001$ ).

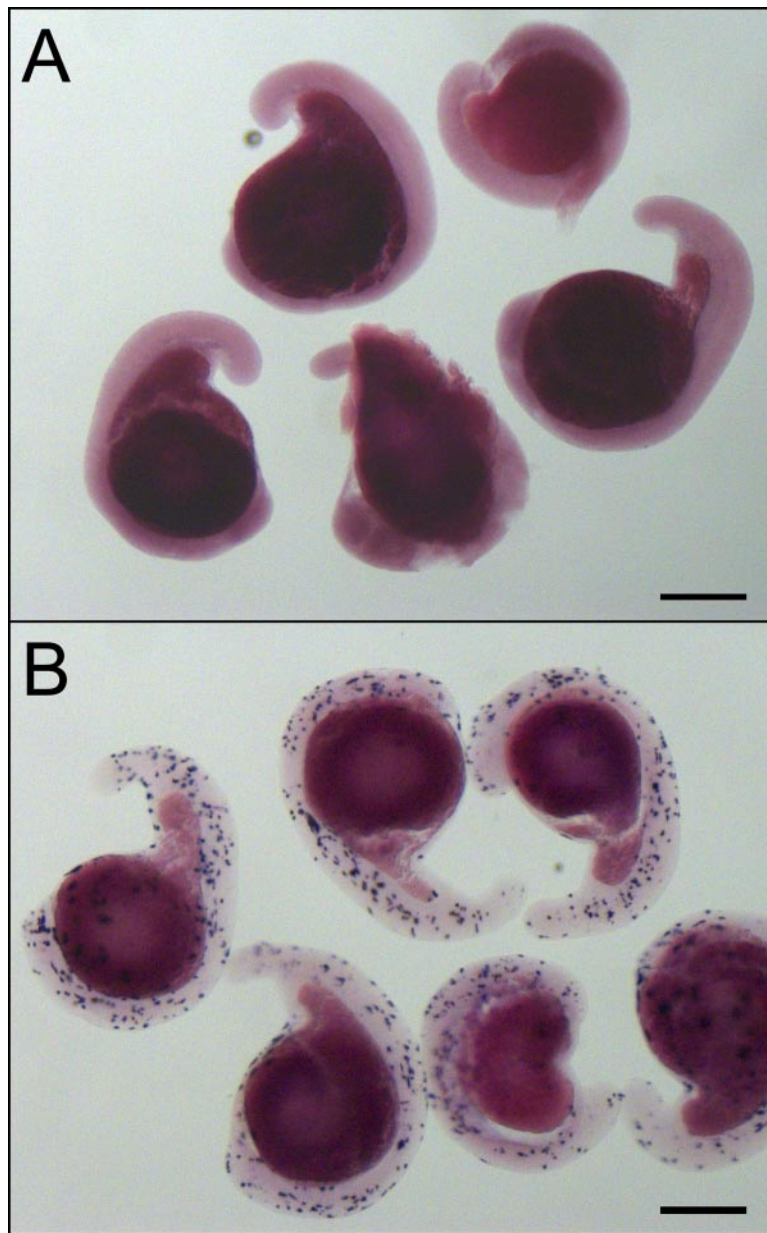

**Fig. S2.** In situ hybridization reveals transient overexpression of *radar*. (A) Uninjected 18 somite embryos, heatshocked at 12–14 somites show no specific pattern of expression after 30 min of color reaction. (B) Embryos injected with 25 ng/μl *hsp70:radar<sup>WT</sup>*, heat-shocked at 12–14 somites show intense staining after 10 min of color reaction, with broad mosaic expression, often, but not always, including the eye. (Scale bars, 100 μm.)

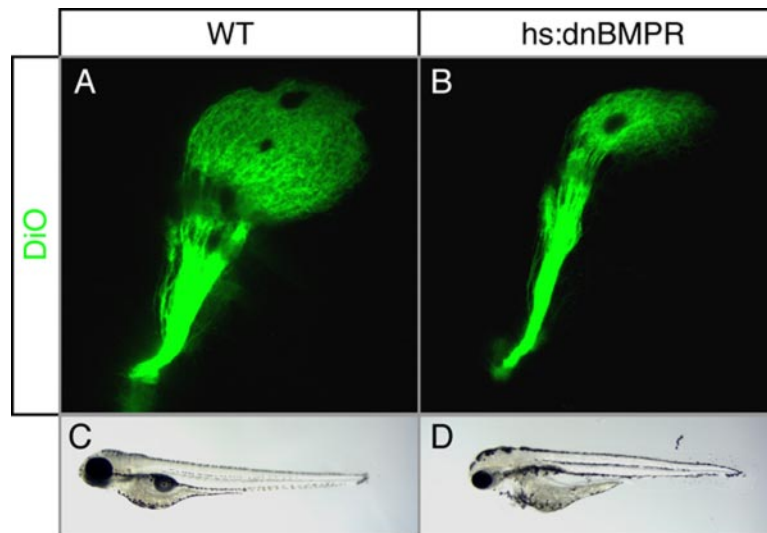

**Fig. S3.** Dominant-negative inhibition of Bmp/Gdf signaling in the eye. (A and B) Lateral view of DiO-filled retinotectal projections in 5 days post-fertilization (dpf) larvae heatshocked at 12 somites. In controls (A), the entire tectum is innervated. In *hs:dnBMPR* transgenic animals (B) only dorsal tectum is innervated, similar to *radar*<sup>s327</sup>. (C and D) Brightfield lateral view of 4 dpf larvae. Control larvae (C) show normal eye size, whereas *hs:dnBMPR* larvae (D) have smaller eyes similar to *radar*<sup>s327</sup>.

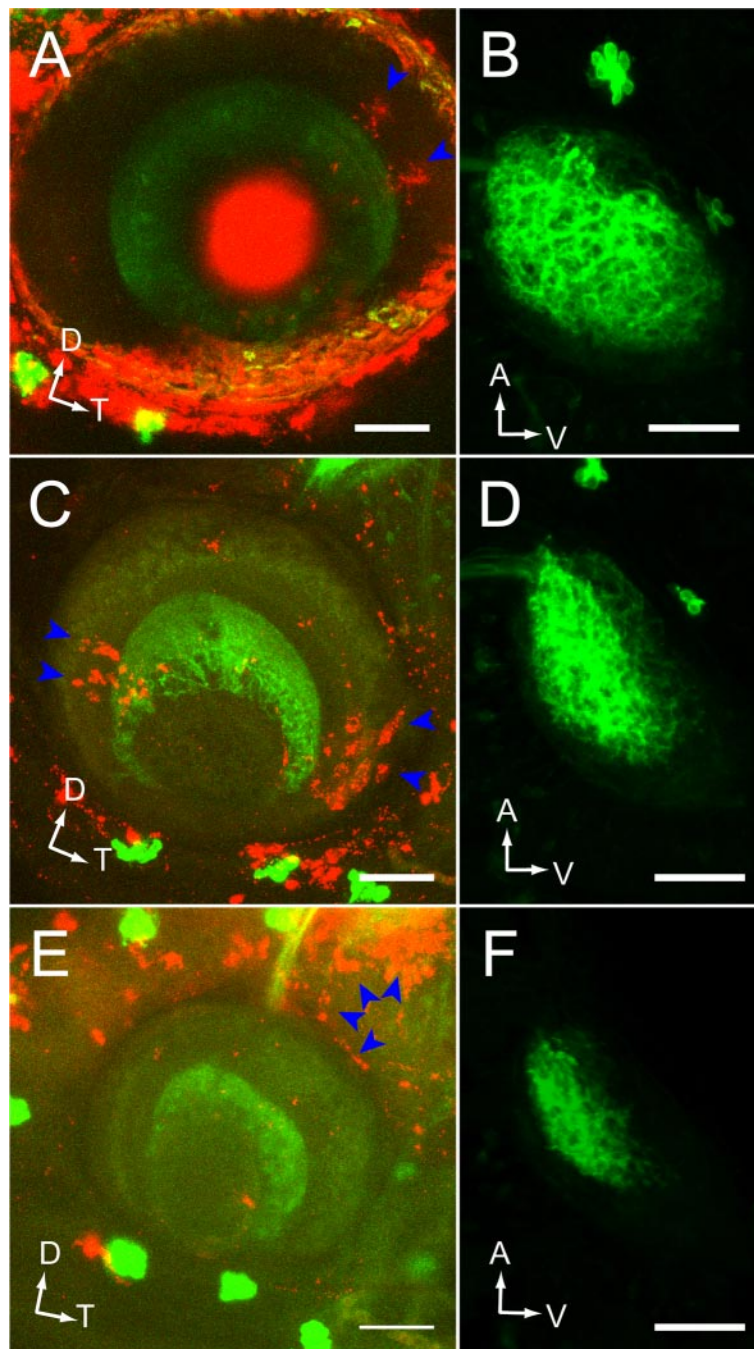

**Fig. S4.** Donor-derived clone location and position-dependent rescue of the retinotectal projection in WT-> *radar*<sup>327</sup> chimeras. (A, C, and E) Lateral confocal projection of the eye. Donor-derived clones were labeled with rhodamine-dextran (blue arrowheads). GFP was only expressed in RGCs of the host. Dorsal up, temporal to the right. (Scale bars, 50  $\mu$ m.) (B, D, and F) Corresponding dorsal confocal projections of tectum. Anterior up, ventral to the right. (Scale bars, 50  $\mu$ m.) (A and B) Donor-derived clones in dorsal eye drive substantial rescue of ventral tectum innervation. (C and D) Donor-derived clones in the ventral eye fail to rescue ventral tectum innervation. (E and F) Donor-derived clones outside of the eye do not rescue ventral tectum innervation.

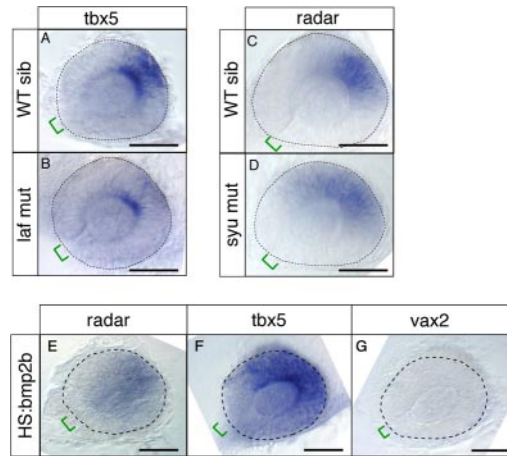

**Fig. S5.** Additional analysis of Radar signaling and regulation. (A–G) Dissected eyes following whole-mount in situ hybridizations on 26-somite embryos with the antisense probes indicated. (Scale bars, 50  $\mu\text{m}$ .) (A) WT eyes express *tbx5* in the dorsal retina, opposite of the optic fissure. (B) *lost-a-fin* (*laf*) mutants, lacking functional Alk8 receptor, have reduced expression of *tbx5*. (C) In WT eyes *radar* expression is restricted to a narrow patch opposite of the optic fissure. (D) In *sonic you* (*syu*) mutants, in which Shh is disrupted, *radar* expression is slightly expanded to the ventral retina. (E–G) *bmp2b* overexpression mirrors the effects of *bmp4* overexpression. *hsp70:bmp2b* transgenic fish were induced at 12–14 somites to overexpress *bmp2b*. *radar* expression is weakly expanded, *tbx5* expression is strongly up-regulated, *vax2* expression is absent from the retina.
